# Supplementary material for: Serologic response following SARS-COV2 vaccination in patients with cancer: a systematic review and meta-analysis
Source: J Hematol Oncol. 2022 Feb 5;15:15. doi: 10.1186/s13045-022-01233-3 (PMC8817639; doi:10.1186/s13045-022-01233-3)
Supplement: Supplementary file 1 — Additional file 1. Supplementary Figure 1. Funnel plot, sensitivity analyses, and subgroup analyses for serologic response after one dose of vaccine. Supplementary Figure 2. Funnel plot, sensitivity analyses, and subgroup analyses for serologic response after two doses of vaccine. Supplementary Figure 3. Funnel plots of studies included in meta-analyses of comparison of serologic response after one and two doses of vaccine compared to controls. [file 13045_2022_1233_MOESM1_ESM.pdf]

Supplementary Figure 1.

A. Funnel plot of studies included in meta-analysis of serologic response after one dose of vaccine

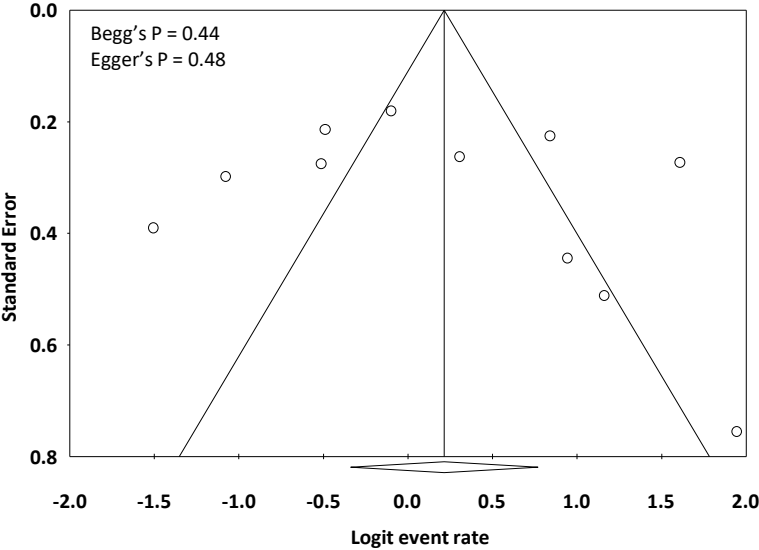

B. Sensitivity analysis excluding one study at a time for serologic response after one dose of vaccine

| Removed study  |       | Event rate (95% CI)<br>with study removed |             |  |
|----------------|-------|-------------------------------------------|-------------|--|
|                | Point | Lower limit                               | Upper limit |  |
| Monin Solid    | 0.555 | 0.416                                     | 0.686       |  |
| Monin Hemato   | 0.574 | 0.447                                     | 0.691       |  |
| Harrington CML | 0.509 | 0.382                                     | 0.635       |  |
| Bird           | 0.537 | 0.391                                     | 0.676       |  |
| Chowdhury      | 0.534 | 0.393                                     | 0.670       |  |
| Terpos         | 0.567 | 0.437                                     | 0.689       |  |
| Harrington MPD | 0.515 | 0.384                                     | 0.644       |  |
| Pimpinelli     | 0.556 | 0.414                                     | 0.689       |  |
| Addeo Solid    | 0.489 | 0.381                                     | 0.599       |  |
| Addeo Hemato   | 0.519 | 0.386                                     | 0.649       |  |
| Barrière       | 0.547 | 0.397                                     | 0.689       |  |
| Overall        | 0.537 | 0.409                                     | 0.660       |  |

C. Sensitivity analysis excluding non-mRNA studies for serologic response after one dose of vaccine

| Subgroup           | Study name     | Event rate | Lower limit | Upper limit | Total     | Event rate and 95% CI | Relative weight |
|--------------------|----------------|------------|-------------|-------------|-----------|-----------------------|-----------------|
| Hematologic cancer | Monin Hemato   | 0.182      | 0.094       | 0.323       | 8 / 44    |                       | 21.06           |
|                    | Harrington CML | 0.875      | 0.614       | 0.969       | 14 / 16   |                       | 16.22           |
|                    | Harrington MPD | 0.762      | 0.540       | 0.897       | 16 / 21   |                       | 19.53           |
|                    | Pimpinelli     | 0.380      | 0.287       | 0.483       | 35 / 92   |                       | 22.79           |
|                    | Addeo Hemato   | 0.720      | 0.518       | 0.860       | 18 / 25   |                       | 20.40           |
|                    | Subtotal       | 0.576      | 0.319       | 0.798       | 91 / 198  |                       |                 |
| Solid cancer       | Monin Solid    | 0.375      | 0.259       | 0.508       | 21 / 56   |                       | 32.85           |
|                    | Addeo Solid    | 0.833      | 0.745       | 0.895       | 80 / 96   |                       | 32.89           |
|                    | Barrière       | 0.475      | 0.388       | 0.564       | 58 / 122  |                       | 34.26           |
|                    | Subtotal       | 0.581      | 0.304       | 0.815       | 159 / 274 |                       |                 |
| Overall            |                | 0.579      | 0.385       | 0.750       | 250 / 472 |                       |                 |

Hemato: Heterogeneity:  $I^2 = 88.46\%$ ,  $Q = 34.67$ ,  $P < 0.001$   
Solid: Heterogeneity:  $I^2 = 94.41\%$ ,  $Q = 35.83$ ,  $P < 0.001$   
Overall: Heterogeneity:  $I^2 = 90.58\%$ ,  $Q = 74.37$ ,  $P < 0.001$

## Supplementary Figure 1.

### D. Subgroup analysis stratified by type of disease in hematologic cancer studies for serologic response after one dose of vaccine

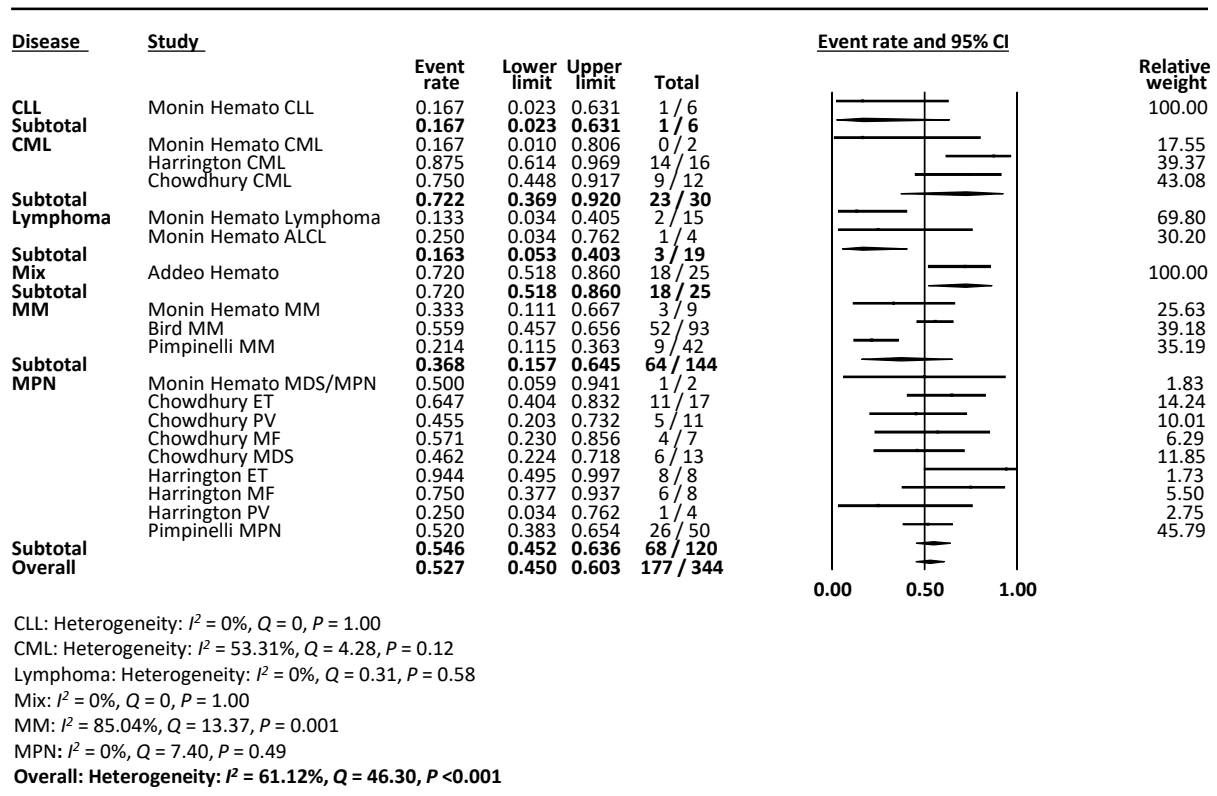

### E. Subgroup analysis stratified by type of disease in solid organ cancer studies for serologic response after one dose of vaccine

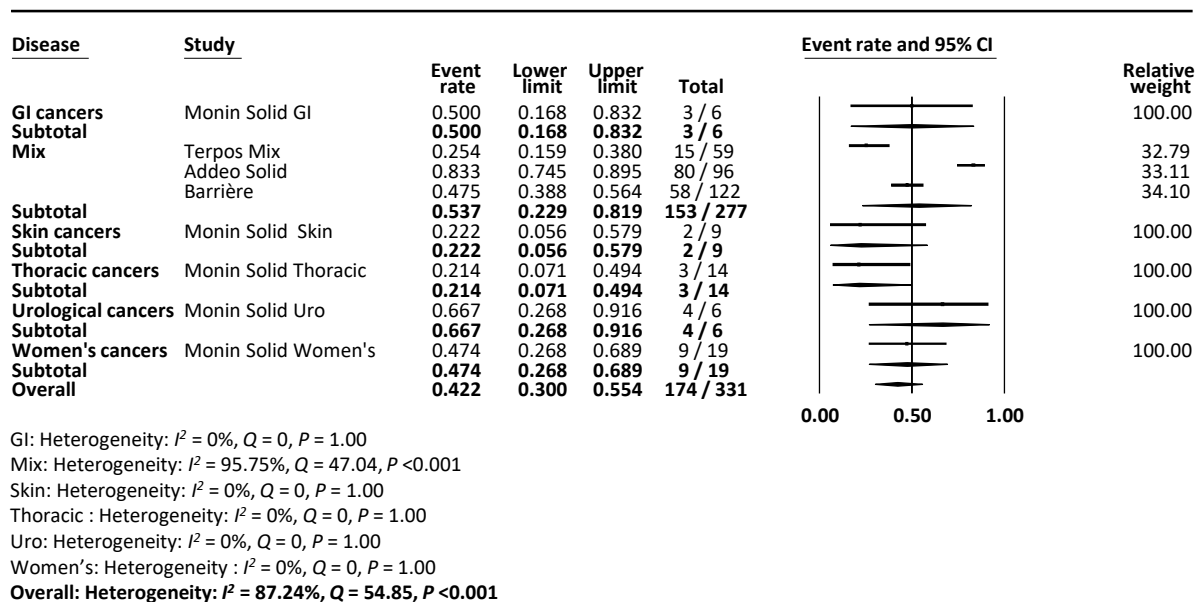

## Supplementary Figure 1.

### F. Subgroup analysis stratified by type of vaccine in hematologic and solid organ cancer studies for serologic response after one dose of vaccine

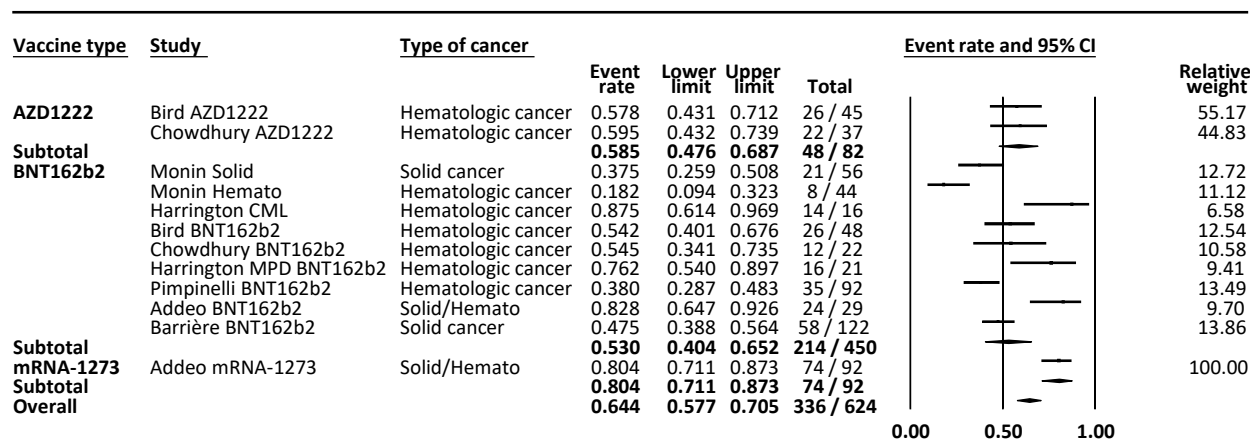

AZD1222: Heterogeneity:  $I^2 = 0\%$ ,  $Q = 0.024$ ,  $P = 0.88$

BNT162b2: Heterogeneity:  $I^2 = 82.02\%$ ,  $Q = 44.50$ ,  $P < 0.001$

mRNA-1273: Heterogeneity:  $I^2 = 0\%$ ,  $Q = 0$ ,  $P = 1.00$

Overall: Heterogeneity:  $I^2 = 85.51\%$ ,  $Q = 75.90$ ,  $P < 0.001$

### G. Subgroup analysis stratified by type of therapy in hematologic and solid organ cancer studies for serologic response after one dose of vaccine

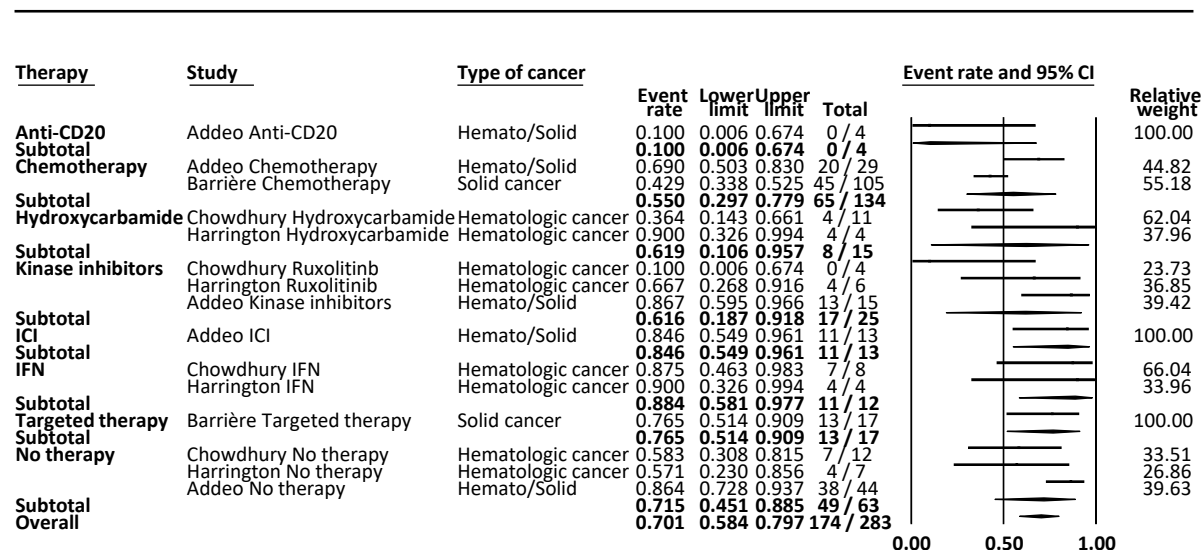

Anti-CD20: Heterogeneity:  $I^2 = 0\%$ ,  $Q = 0$ ,  $P = 1.00$

Chemotherapy: Heterogeneity:  $I^2 = 83.05\%$ ,  $Q = 5.90$ ,  $P = 0.015$

Hydroxycarbamide : Heterogeneity:  $I^2 = 65.59\%$ ,  $Q = 2.91$ ,  $P = 0.088$

Kinase inhibitors:  $I^2 = 66.73\%$ ,  $Q = 6.01$ ,  $P = 0.050$

ICI:  $I^2 = 0\%$ ,  $Q = 0$ ,  $P = 1.00$

IFN:  $I^2 = 0\%$ ,  $Q = 0.019$ ,  $P = 0.89$

Targeted therapy:  $I^2 = 0\%$ ,  $Q = 0$ ,  $P = 1.00$

No therapy:  $I^2 = 64.96\%$ ,  $Q = 5.71$ ,  $P = 0.058$

Overall: Heterogeneity:  $I^2 = 69.52\%$ ,  $Q = 45.93$ ,  $P < 0.001$

## Supplementary Figure 2.

### A. Funnel plot of studies included in meta-analysis of serologic response after two doses of vaccine

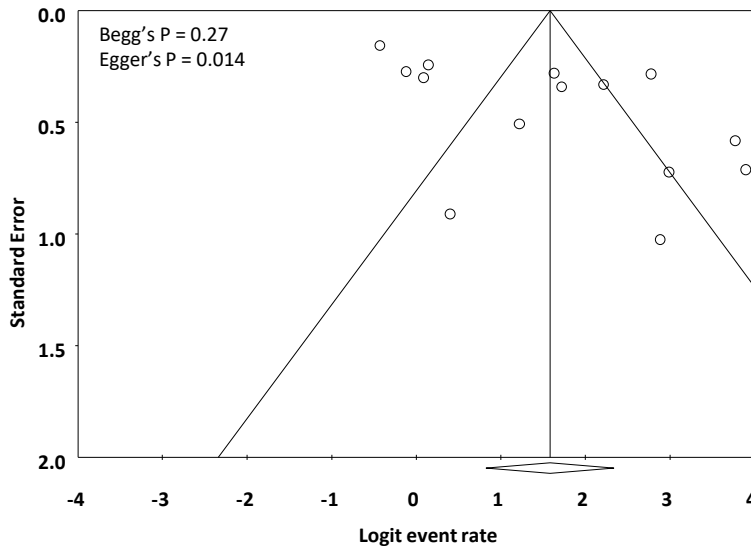

### B. Sensitivity analysis excluding preprints for serologic response after two doses of vaccine

| Subgroup           | Study name      | Event rate   | Lower limit  | Upper limit  | Total             | Event rate and 95% CI | Relative weight |
|--------------------|-----------------|--------------|--------------|--------------|-------------------|-----------------------|-----------------|
| Hematologic cancer | Monin Hemato    | 0.600        | 0.200        | 0.900        | 3 / 5             |                       | 11.28           |
|                    | Herishanu       | 0.395        | 0.324        | 0.471        | 66 / 167          |                       | 19.02           |
|                    | Roeker          | 0.523        | 0.377        | 0.664        | 23 / 44           |                       | 18.01           |
|                    | Thakkar Hemato  | 0.848        | 0.741        | 0.916        | 56 / 66           |                       | 17.63           |
|                    | Pimpinelli      | 0.837        | 0.747        | 0.899        | 77 / 92           |                       | 18.18           |
|                    | Addeo Hemato    | 0.773        | 0.556        | 0.902        | 17 / 22           |                       | 15.87           |
|                    | <b>Subtotal</b> | <b>0.685</b> | <b>0.462</b> | <b>0.846</b> | <b>242 / 396</b>  |                       |                 |
| Solid cancer       | Monin Solid     | 0.947        | 0.706        | 0.993        | 18 / 19           |                       | 6.07            |
|                    | Thakkar Solid   | 0.978        | 0.933        | 0.993        | 131 / 134         |                       | 14.70           |
|                    | Palich          | 0.942        | 0.902        | 0.966        | 210 / 223         |                       | 30.36           |
|                    | Addeo Solid     | 0.980        | 0.924        | 0.995        | 99 / 101          |                       | 11.00           |
|                    | Barrière        | 0.952        | 0.829        | 0.988        | 40 / 42           |                       | 10.76           |
|                    | Massarweh       | 0.902        | 0.827        | 0.946        | 92 / 102          |                       | 27.11           |
|                    | <b>Subtotal</b> | <b>0.949</b> | <b>0.916</b> | <b>0.970</b> | <b>590 / 621</b>  |                       |                 |
| <b>Overall</b>     |                 | <b>0.916</b> | <b>0.874</b> | <b>0.946</b> | <b>832 / 1017</b> |                       |                 |

Hemato: Heterogeneity:  $I^2 = 92.23\%$ ,  $Q = 64.35$ ,  $P < 0.001$

Solid: Heterogeneity:  $I^2 = 39.79\%$ ,  $Q = 8.31$ ,  $P = 0.14$

Overall: Heterogeneity:  $I^2 = 94.57\%$ ,  $Q = 202.68$ ,  $P < 0.001$

### C. Sensitivity analysis excluding one study at a time for serologic response after two doses of vaccine

| Removed study  | Point       | Lower limit | Upper limit | Event rate (95% CI)<br>with study removed |
|----------------|-------------|-------------|-------------|-------------------------------------------|
| Monin Solid    | 0.82        | 0.68        | 0.91        |                                           |
| Monin Hemato   | 0.84        | 0.70        | 0.92        |                                           |
| Herishanu      | 0.85        | 0.73        | 0.92        |                                           |
| Agha           | 0.85        | 0.71        | 0.93        |                                           |
| Roeker         | 0.85        | 0.71        | 0.93        |                                           |
| Thakkar Solid  | 0.80        | 0.66        | 0.90        |                                           |
| Thakkar Hemato | 0.83        | 0.68        | 0.91        |                                           |
| Palich         | 0.81        | 0.68        | 0.90        |                                           |
| Diefenbach     | 0.85        | 0.71        | 0.93        |                                           |
| Pimpinelli     | 0.83        | 0.68        | 0.92        |                                           |
| Addeo Solid    | 0.81        | 0.66        | 0.90        |                                           |
| Addeo Hemato   | 0.83        | 0.69        | 0.92        |                                           |
| Barrière       | 0.82        | 0.67        | 0.91        |                                           |
| Massarweh      | 0.82        | 0.68        | 0.91        |                                           |
| <b>Overall</b> | <b>0.83</b> | <b>0.70</b> | <b>0.91</b> |                                           |

## Supplementary Figure 2.

### D. Subgroup analysis stratified by type of disease in hematologic cancer studies for serologic response after two doses of vaccine

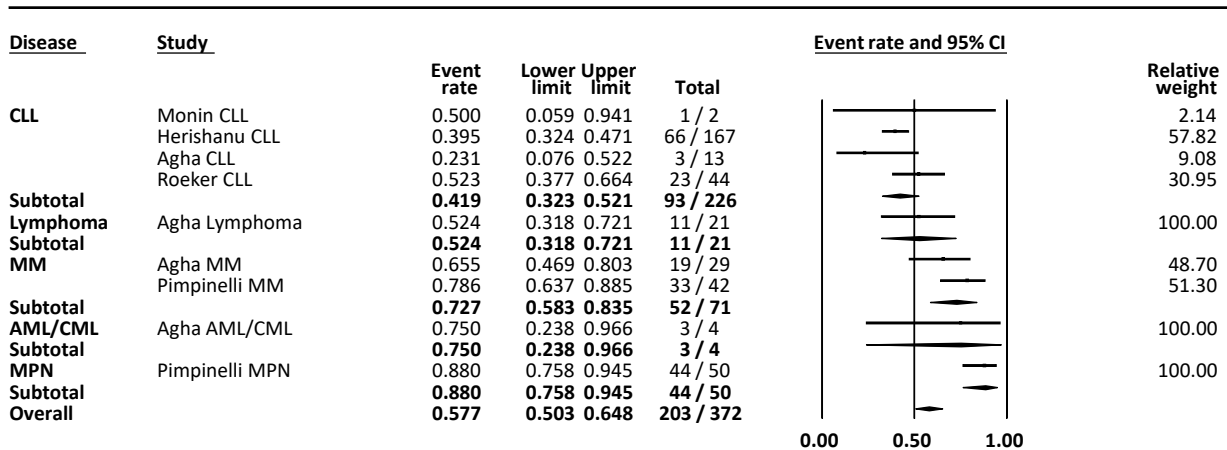

CLL: Heterogeneity:  $I^2 = 26.94\%$ ,  $Q = 4.11$ ,  $P = 0.25$

Lymphoma: Heterogeneity:  $I^2 = 0\%$ ,  $Q = 0$ ,  $P = 1.00$

MM:  $I^2 = 31.97\%$ ,  $Q = 1.47$ ,  $P = 0.23$

AML/CML: Heterogeneity:  $I^2 = 0\%$ ,  $Q = 0$ ,  $P = 1.00$

MPN:  $I^2 = 0\%$ ,  $Q = 0$ ,  $P = 1.00$

**Overall: Heterogeneity:  $I^2 = 82.86\%$ ,  $Q = 46.68$ ,  $P < 0.001$**

### E. Subgroup analysis stratified by type of disease in solid organ cancer studies for serologic response after two doses of vaccine

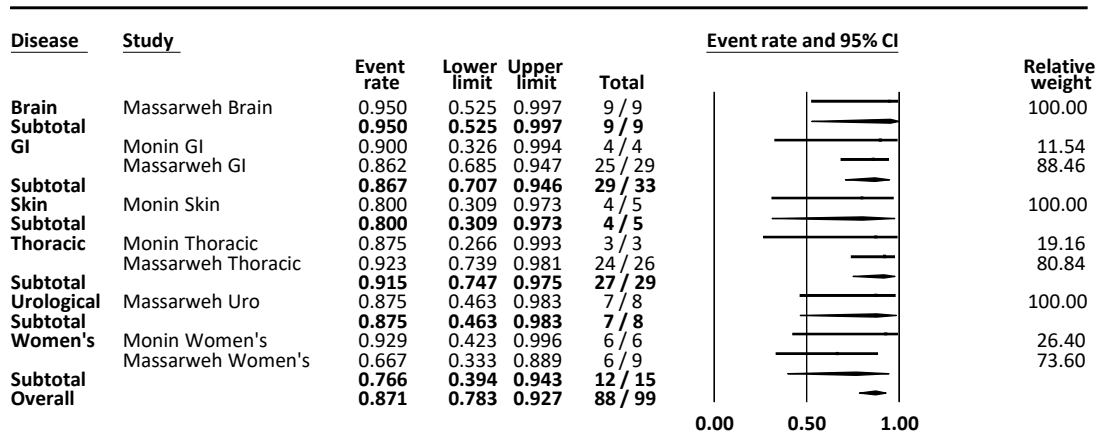

Brain: Heterogeneity:  $I^2 = 0\%$ ,  $Q = 0$ ,  $P = 1.00$

GI: Heterogeneity:  $I^2 = 0\%$ ,  $Q = 0.053$ ,  $P = 0.82$

Skin: Heterogeneity:  $I^2 = 0\%$ ,  $Q = 0$ ,  $P = 1.00$

Thoracic : Heterogeneity:  $I^2 = 0\%$ ,  $Q = 0.10$ ,  $P = 0.75$

Urological: Heterogeneity:  $I^2 = 0\%$ ,  $Q = 0$ ,  $P = 1.00$

Women's: Heterogeneity :  $I^2 = 24.26\%$ ,  $Q = 1.32$ ,  $P = 0.25$

**Overall: Heterogeneity:  $I^2 = 0\%$ ,  $Q = 4.45$ ,  $P = 0.82$**

## Supplementary Figure 2.

### F. Subgroup analysis stratified by type of vaccine in hematologic and solid organ cancer studies for serologic response after two dose of vaccine

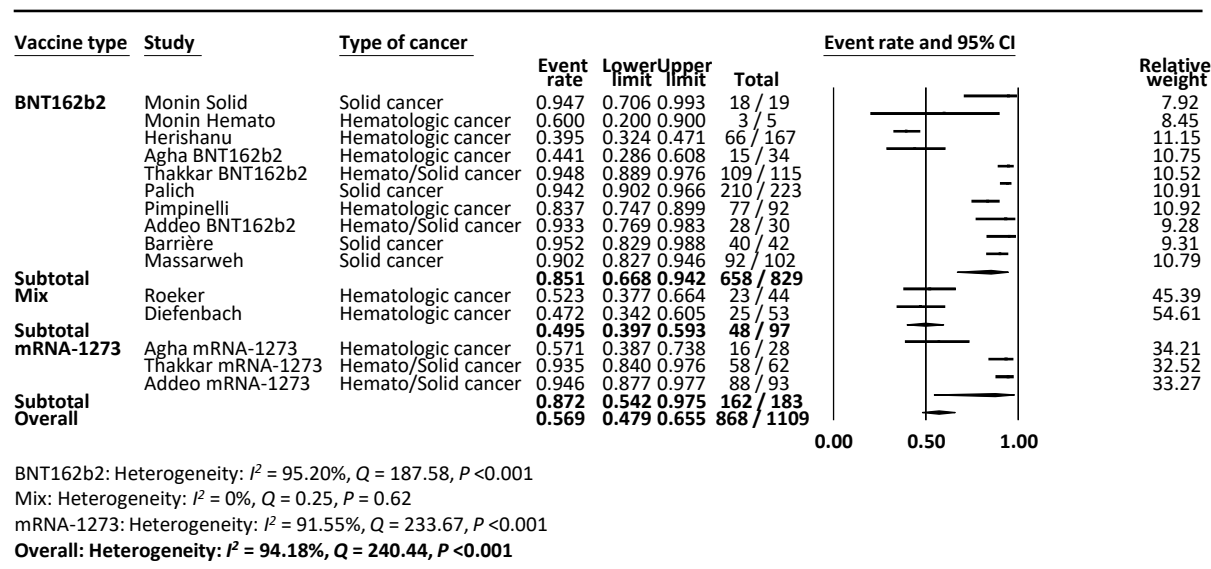

### G. Subgroup analysis stratified by type of therapy in hematologic and solid organ cancer studies for serologic response after two doses of vaccine

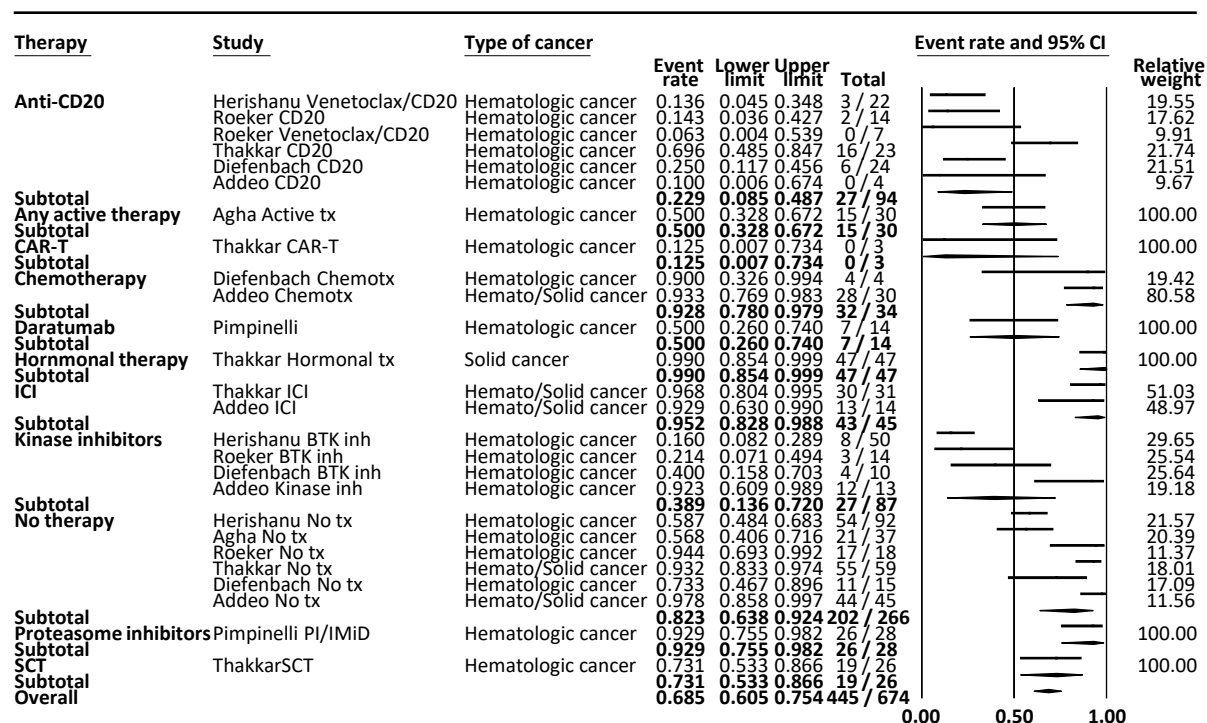

Supplementary Figure 3.

A. Funnel plot of studies included in meta-analysis of comparison of serologic response after one dose of vaccine compared to controls

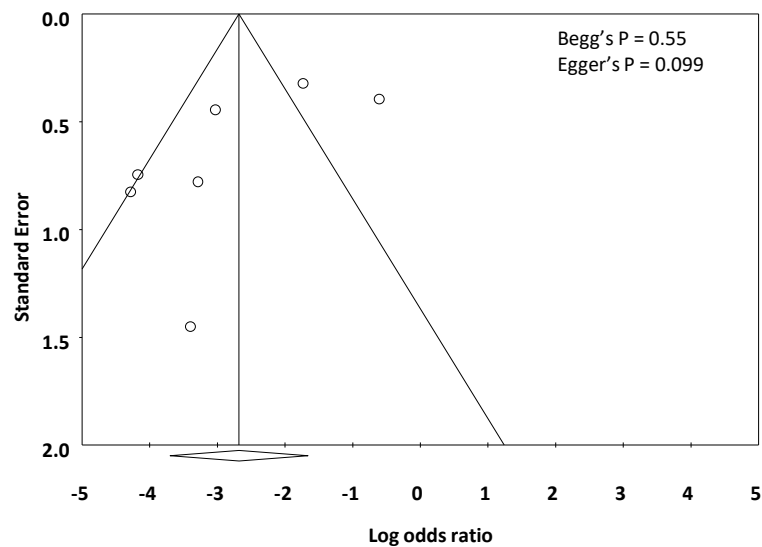

B. Funnel plot of studies included in meta-analysis of comparison of serologic response after two doses of vaccine compared to controls

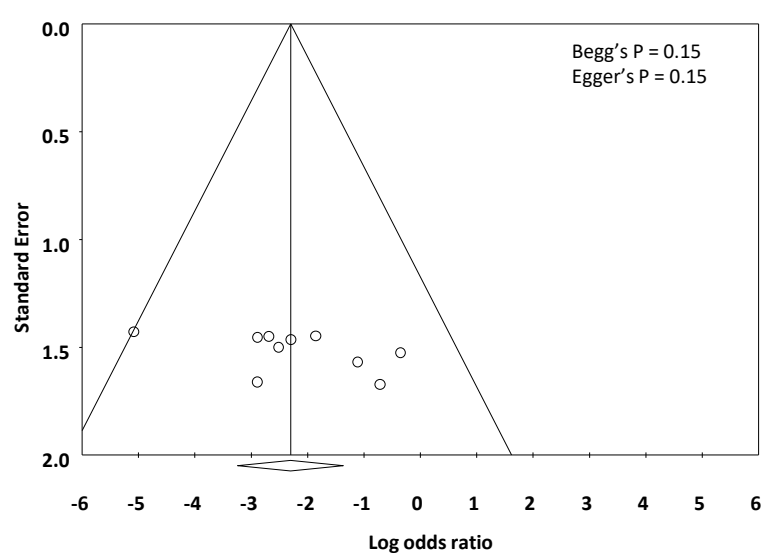

## Supplementary Figure Legends

**Supplementary Figure 1. (A)** Funnel plot of studies included in meta-analysis of serological response after one dose of vaccine. Begg's test  $P = 0.44$ ; Egger's tests  $P = 0.48$ . **(B)** Sensitivity analysis excluding one study at a time for serologic response after one dose of vaccine. **(C)** Sensitivity analysis excluding non-mRNA studies for serologic response after one dose of vaccine. **(D)** Subgroup analysis stratified by type of disease in hematologic cancer studies for serologic response after one dose of vaccine. **(E)** Subgroup analysis stratified by type of disease in solid organ cancer studies for serologic response after one dose of vaccine. **(F)** Subgroup analysis stratified by type of vaccine in hematologic and solid organ cancer studies for serologic response after one dose of vaccine. **(G)** Subgroup analysis stratified by type of therapy in hematologic and solid organ cancer studies for serologic response after one dose of vaccine.

**Supplementary Figure 2. (A)** Funnel plot of studies included in meta-analysis of serological response after two doses of vaccine. Begg's test  $P = 0.27$ ; Egger's tests  $P = 0.014$ . **(B)** Sensitivity analysis excluding preprints for serologic response after two doses of vaccine. **(C)** Sensitivity analysis excluding one study at a time for serologic response after two doses of vaccine. **(D)** Subgroup analysis stratified by type of disease in hematologic cancer studies for serologic response after two doses of vaccine. **(E)** Subgroup analysis stratified by type of disease in solid organ cancer studies for serologic response after two doses of vaccine. **(F)** Subgroup analysis stratified by type of vaccine in hematologic and solid organ cancer studies for serologic response after two doses of vaccine. **(G)** Subgroup analysis stratified by type of therapy in hematologic and solid organ cancer studies for serologic response after two doses of vaccine.

**Supplementary Figure 3. (A)** Funnel plot of studies included in meta-analysis of comparison of serological response after one dose of vaccine compared to controls. Begg's test  $P = 0.55$ ; Egger's tests  $P = 0.099$ . **(B)** Funnel plot of studies included in meta-analysis of comparison of serological response after two doses of vaccine compared to controls. Begg's test  $P = 0.15$ ; Egger's tests  $P = 0.15$ .

**Supplementary Table 1. Search strategy**

| <b>PubMed search strategy</b>  |                                                                                                                   | <b>Number of studies</b> |
|--------------------------------|-------------------------------------------------------------------------------------------------------------------|--------------------------|
| #1                             | "COVID-19" OR "SARS-CoV-2" [MeSH Terms]                                                                           | 98,051                   |
| #2                             | "cancer" OR "malignancy" OR "leukemia" OR "lymphoma" OR "immunosuppressed" OR "hematologic diseases" [MeSH Terms] | 2,567,229                |
| #3                             | "vaccine" OR "immunization" [MeSH Terms]                                                                          | 162,867                  |
| #4                             | #1 AND #2 AND #3                                                                                                  | 602                      |
| <b>EMBASE search strategy</b>  |                                                                                                                   | <b>Number of studies</b> |
| #1                             | "COVID-19" OR "SARS-CoV-2" [MeSH Terms]                                                                           | 87,226                   |
| #2                             | "cancer" OR "malignancy" OR "leukemia" OR "lymphoma" OR "immunosuppressed" OR "hematologic diseases" [MeSH Terms] | 2,015,921                |
| #3                             | "vaccine" OR "immunization" [MeSH Terms]                                                                          | 139,516                  |
| #4                             | #1 AND #2 AND #3                                                                                                  | 591                      |
| <b>medRxiv search strategy</b> |                                                                                                                   | <b>Number of studies</b> |
| #1                             | "COVID-19" OR "SARS-CoV-2"                                                                                        | 14,517                   |
| #2                             | "cancer" OR "malignancy" OR "leukemia" OR "lymphoma" OR "immunosuppressed" OR "hematologic diseases"              | 21,185                   |
| #3                             | "vaccine" OR "immunization"                                                                                       | 11,642                   |
| #4                             | #1 AND #2 AND #3                                                                                                  | 420                      |

**Supplementary Table 2. Risk of bias assessment by Joanna Briggs Institute Critical Appraisal Checklist**

| Author     | Year | Q1      | Q2  | Q3  | Q4      | Q5      | Q6      | Q7      | Q8  | Q9      |
|------------|------|---------|-----|-----|---------|---------|---------|---------|-----|---------|
| Monin      | 2021 | Yes     | Yes | Yes | Yes     | Yes     | Yes     | Yes     | Yes | Yes     |
| Harrington | 2021 | Yes     | Yes | Yes | No      | Yes     | Yes     | Yes     | Yes | Yes     |
| Bird       | 2021 | Yes     | Yes | Yes | Unclear | No      | NA      | Yes     | Yes | Yes     |
| Herishanu  | 2021 | Yes     | Yes | Yes | Yes     | No      | Yes     | Yes     | Yes | Yes     |
| Agha       | 2021 | Yes     | Yes | Yes | No      | No      | Yes     | Yes     | Yes | Yes     |
| Roeker     | 2021 | Yes     | Yes | Yes | No      | Yes     | Yes     | Yes     | Yes | Yes     |
| Thakkar    | 2021 | Yes     | Yes | Yes | Yes     | No      | Yes     | Yes     | Yes | Yes     |
| Palich     | 2021 | Yes     | Yes | Yes | Yes     | Yes     | Yes     | No      | Yes | Yes     |
| Chowdhury  | 2021 | Yes     | Yes | Yes | Yes     | No      | Yes     | Unclear | Yes | Yes     |
| Diefenbach | 2021 | Yes     | Yes | Yes | Yes     | Unclear | Unclear | Yes     | Yes | Unclear |
| Terpos     | 2021 | Yes     | Yes | Yes | Yes     | Yes     | Yes     | Yes     | Yes | Yes     |
| Harrington | 2021 | Unclear | Yes | Yes | No      | Yes     | Yes     | Yes     | Yes | Yes     |
| Pimpinelli | 2021 | Yes     | Yes | Yes | Yes     | Yes     | Yes     | Yes     | Yes | Yes     |
| Addeo      | 2021 | Yes     | Yes | Yes | No      | Yes     | No      | Yes     | Yes | Yes     |
| Barrière   | 2021 | Yes     | Yes | Yes | Yes     | Yes     | No      | Yes     | Yes | Yes     |
| Massarweh  | 2021 | Yes     | Yes | Yes | Yes     | No      | Yes     | Yes     | Yes | Yes     |

Q1: Is it clear in the study what is the 'cause' and what is the 'effect' (i.e. there is no confusion about which variable comes first)?; Q2: Were the participants included in any comparisons similar?; Q3: Were the participants included in any comparisons receiving similar treatment/care, other than the exposure or intervention of interest?; Q4: Was there a control group?; Q5: Were there multiple measurements of the outcome both pre and post the intervention/exposure?; Q6: Was follow up complete and if not, were differences between groups in terms of their follow up adequately described and analyzed?; Q7: Were the outcomes of participants included in any comparisons measured in the same way?; Q8: Were outcomes measured in a reliable way?; Q9: Was appropriate statistical analysis used?; NA not applicable.

**Supplementary Table 3. Univariate and multivariate meta-regression models of variables associated with serologic response after one dose of vaccine**

|                            | Univariate meta-regression |                  |                  | Multivariate meta-regression |                  |                  |
|----------------------------|----------------------------|------------------|------------------|------------------------------|------------------|------------------|
|                            | Coefficient                | 95% CI           | P-value          | Coefficient                  | 95% CI           | P-value          |
| <b>Anti-cancer therapy</b> | -0.036                     | -0.066-(-0.0053) | 0.021            | -0.029                       | -0.055-(-0.0016) | <b>0.038</b>     |
| <b>Age</b>                 | -0.11                      | -0.17-(-0.056)   | <b>&lt;0.001</b> | -0.11                        | -0.16-(-0.050)   | <b>&lt;0.001</b> |
| <b>Hematologic cancer</b>  | 0.28                       | -0.86-1.42       | 0.63             | -0.33                        | -1.080-0.41      | 0.38             |

**Supplementary Table 4. Univariate and multivariate meta-regression models of variables associated with serologic response after two doses of vaccine**

|                            | Univariate meta-regression |               |                  | Multivariate meta-regression |               |                  |
|----------------------------|----------------------------|---------------|------------------|------------------------------|---------------|------------------|
|                            | Coefficient                | 95% CI        | P-value          | Coefficient                  | 95% CI        | P-value          |
| <b>Anti-cancer therapy</b> | 0.038                      | 0.010-0.066   | <b>0.0077</b>    | 0.012                        | -0.014-0.037  | 0.38             |
| <b>Age</b>                 | -0.11                      | -0.33-0.11    | 0.32             | -0.033                       | -0.17-(-0.47) | 0.64             |
| <b>Hematologic cancer</b>  | -2.46                      | -3.45-(-1.48) | <b>&lt;0.001</b> | -2.16                        | -3.26-(-3.86) | <b>&lt;0.001</b> |

**Supplementary Table 5. Grading of Recommendations, Assessment, Development, and Evaluation (GRADE) criteria for studies included in the meta-analysis**

**(A) Meta-analysis of observational studies assessing serological response after two doses of vaccine**

| Number of participants | Starting Level of Evidence | Quality assessment |               |              |             |                  | Reasons to increase level of evidence (Large magnitude of effect; Dose-response gradient; Potential confounding) | Overall quality of evidence |
|------------------------|----------------------------|--------------------|---------------|--------------|-------------|------------------|------------------------------------------------------------------------------------------------------------------|-----------------------------|
|                        |                            | Risk of Bias       | Inconsistency | Indirectness | Imprecision | Publication bias |                                                                                                                  |                             |
| 1137                   | Low                        | Not serious        | Not serious   | Serious      | Not serious | Not serious      | N/A                                                                                                              | Low                         |

**(B) Meta-analysis of case control studies comparing serological response after two doses of vaccine to controls**

| Number of participants         | Starting Level of Evidence | Quality assessment |               |              |             |                  | Reasons to increase level of evidence (Large magnitude of effect; Dose-response gradient; Potential confounding) | Overall quality of evidence |
|--------------------------------|----------------------------|--------------------|---------------|--------------|-------------|------------------|------------------------------------------------------------------------------------------------------------------|-----------------------------|
|                                |                            | Risk of Bias       | Inconsistency | Indirectness | Imprecision | Publication bias |                                                                                                                  |                             |
| 903 (cases) and 320 (controls) | Low                        | Not serious        | Serious       | Serious      | Not serious | Not serious      | N/A                                                                                                              | Low                         |
